# Supplementary material for: A novel bioresponsive self-immolative spacer based on aza-quinone methide reactivity for the controlled release of thiols, phenols, amines, sulfonamides or amides
Source: Chem Sci. 2024 Apr 2;15(16):6168–77. doi: 10.1039/d4sc01576b (PMC11041255; doi:10.1039/d4sc01576b)
Supplement: SC-015-D4SC01576B-s001 [file SC-015-D4SC01576B-s001.xlsx]

## Sheet: Foglio1 (2)
			NPYM-20									NPYM-21									NPYM-22
			Time (h)	Exp1	Exp2	Exp3	Media	Dev. STD	SEM %	Error %		Time (h)	Exp1	Exp2	Exp3	Media	Dev. STD	SEM%	Error %		Time (h)	Exp1	Exp2	Exp3	Media	Dev. STD	SEM%	Error %
			0	2.03	1.91	1.89	1.94333	0.0757188	4.37163	4.97773		0	0	0.06	0.03	0.03	0.03	1.73205	2.08167		0	0	0	0	0	0	0	4.09607
			0.25	26.97	27.12	26.91	27	0.108167	6.245			0.25	83.07	83.01	82.95	83.01	0.06	3.4641			0.25	46.02	45.97	45.92	45.97	0.05	2.88675
			0.5	40.89	41.08	41.02	40.9967	0.0971253	5.60753			0.5	90.45	90.51	90.42	90.46	0.0458258	2.64575			0.5	58	57.95	58.14	58.03	0.0984886	5.68624
			1	56.02	56.11	55.96	56.03	0.0754983	4.3589			1	92.73	92.75	92.68	92.72	0.0360555	2.08167			1	62.21	62.13	62.28	62.2067	0.0750555	4.33333
			3	81.46	81.54	81.47	81.49	0.043589	2.51661			3	93.64	93.63	93.68	93.65	0.0264575	1.52753			3	79.56	79.51	79.65	79.5733	0.070946	4.09607
			6	94.09	94.12	93.92	94.0433	0.107858	6.22718			8	93.64								6	87.3	87.22	87.34	87.2867	0.061101	3.52767
			8	95.15	95.09	94.98	95.0733	0.0862168	4.97773												8	89.04	89.98	89.15	89.39	0.513907	29.6704
		NPYM-23										Cyclohexylamine NPYM-24									NPYM-25
		Time (h)	Exp1	Exp2	Exp3	Media	Dev. STD	SEM%	Error %			Time (h)	Exp1	Exp2	Exp3	Media	Dev. STD	SEM%	Error %		Time (h)	Exp1	Exp2	Exp3	Media	Dev. STD	SEM%	Error %
		0	0	0	0	0	0	0	6.14451			0	0	0	0.2	0.0666667	0.11547	6.66667	3.1798		0	0.03	0.06	0.17	0.0866667	0.0737111	4.25572	4.25572
		0.25	19.91	19.99	19.76	19.8867	0.116762	6.74125				0.25	13.02	13.16	12.98	13.0533	0.0945163	5.4569			0.25	61.03	61.08	61.05	61.0533	0.0251661	1.45297
		0.5	33.06	32.98	32.95	32.9967	0.0568624	3.28295				0.5	85.73	85.78	85.7	85.7367	0.0404145	2.33333			0.5	98.21	97.81	98.26	98.0933	0.246644	14.24
		1	58.61	58.57	58.83	58.67	0.14	8.0829				1	98.89	98.83	98.92	98.88	0.0458258	2.64575			1	94.89	95.68	95.81	95.46	0.497896	28.746
		3	84.05	83.98	84.17	84.0667	0.0960902	5.54777				3	99.05	99.1	99.16	99.1033	0.0550757	3.1798			3	94.43	94.88	94.91	94.74	0.268887	15.5242
		8	96.29	96.03	96.41	96.2433	0.194251	11.2151				6	99.12	99.07	99.18	99.1233	0.0550757	3.1798			6	96.35	96.37	96.41	96.3767	0.0305505	1.76383
												8	99.84	99.8	99.87	99.8367	0.0351188	2.02759			8	97.84	97.79	97.7	97.7767	0.070946	4.09607
			NPYM-26										NPYM-27								NPYM-28
			Time (h)	Exp1	Exp2	Exp3	Media	Dev. STD	SEM%	Error %			Time (h)	Exp1	Exp2	Exp3	Media	Dev. STD	SEM%	Error %	Time (h)	Exp1	Exp2	Exp3	Media	Dev. STD	SEM%	Error %
			0	0	0.06	0	0.02	0.034641	2	5.06189			0	0	0	0	0	0	0	2.24268	0	0.5	0.47	0.54	0.503333	0.0351188	2.02759	2.25957
			0.25	57.93	58.02	57.97	57.9733	0.0450925	2.60342				0.25	10.21	9.98	10.15	10.1133	0.119304	6.88799		0.25	81.41	81.39	81.44	81.4133	0.0251661	1.45297
			0.5	69.22	69.75	69.15	69.3733	0.328075	18.9414				0.5	33.56	33.49	33.51	33.52	0.0360555	2.08167		0.5	92.72	92.69	92.77	92.7267	0.0404145	2.33333
			1	81.23	81.06	81.25	81.18	0.104403	6.02771				1	88.03	88.01	87.95	87.9967	0.0416333	2.4037		1	94.1	93.99	94.05	94.0467	0.0550757	3.1798
			3	87.96	88.1	88.01	88.0233	0.070946	4.09607				3	89.97	90.06	89.92	89.9833	0.070946	4.09607		3	94.26	94.32	94.15	94.2433	0.0862168	4.97773
			6	94.11	95.11	94.76	94.66	0.507445	29.2973				6	90.63	90.6	90.57	90.6	0.03	1.73205		6	94.08	94.14	94.07	94.0967	0.0378594	2.18581
			8	94.37	95.23	95.14	94.9133	0.472687	27.2906				8	92.01	91.97	91.87	91.95	0.072111	4.16333		8	94.81	94.77	94.65	94.7433	0.0832666	4.8074
			NPYM-29										NPYM-30
			Time (h)	Exp1	Exp2	Exp3	Media	Dev. STD	SEM%	Error %			Time (h)	Exp1	Exp2	Exp3	Media	Dev. STD	SEM%	Error %
			0	0	0	0	0	0	0	3.28295			0	0	0	0	0	0	0	6.97132
			0.25	33.97	34.01	33.95	33.9767	0.0305505	1.76383				0.25	9.72	9.97	10.24	9.97667	0.260064	15.0148
			0.5	87.63	87.81	87.72	87.72	0.09	5.19615				0.5	54.75	55.01	54.81	54.8567	0.136137	7.85988
			1	94.89	94.9	95.1	94.9633	0.118462	6.83943				1	80.13	80.42	80.08	80.21	0.183576	10.5987
			3	94.11	94.14	94.22	94.1567	0.0568624	3.28295				3	95.28	95.37	95.2	95.2833	0.085049	4.91031
			6	97.26	97.18	97.29	97.2433	0.0568624	3.28295				6	93.01	93.22	93.13	93.12	0.105357	6.08276
			8	96.88	96.86	96.9	96.88	0.02	1.1547				8	97.53	96.68	98.66	97.6233	0.993294	57.3479
			NPYM-31									NPYM-32									NPYM-35
			Time (h)	Exp1	Exp2	Exp3	Media	Dev. STD	SEM%	Error %		Time (h)	Exp1	Exp2	Exp3	Media	Dev. STD	SEM%	Error %		Time (h)	Exp1	Exp2	Exp3	Media	Dev. STD	SEM%	Error %
			0	0	0	0	0	0	0	4.5346		0	0	0	0	0	0	0	3.35373		0	0	0.03	0	0.01	0.0173205	1	2.63607
			0.25	27.52	27.66	27.71	27.63	0.0984886	5.68624			0.25	57.92	57.86	57.81	57.8633	0.0550757	3.1798			0.25	50.87	50.92	50.88	50.89	0.0264575	1.52753
			0.5	61.28	62.02	61.51	61.6033	0.378726	21.8658			0.5	85.42	85.38	85.48	85.4267	0.0503322	2.90593			0.5	72.41	72.37	72.45	72.41	0.04	2.3094
			1	92.65	92.68	92.73	92.6867	0.0404145	2.33333			1	90	89.93	90.09	90.0067	0.0802081	4.63081			1	89.19	89.26	89.29	89.2467	0.051316	2.96273
			3	78.4	78.51	78.49	78.4667	0.0585947	3.38296			3	91.67	91.59	91.71	91.6567	0.061101	3.52767			3	92.36	92.47	92.41	92.4133	0.0550757	3.1798
			6	40.32	40.57	40.21	40.3667	0.184481	10.651			8	91.89	91.9	93.78	92.5233	1.08832	62.834			6	93.13	92.2	92.16	92.4967	0.548847	31.6877
			8	18.78	18.43	18.65	18.62	0.176918	10.2144												8	94.21	94.61	94.37	94.3967	0.201329	11.6237

## Sheet: Foglio1
		NPYM-21								NPYM-32					AMMINA								AMMIDE
		Tempi (h)	Aree	%						Tempi (h)	Aree	%			Tempo (h)	Aree	%						Tempo	Aree	%
		0	0	0						0	0	0			0	0	0						0	0	0
		0.25	183	83.1818						139	0.25	57.9167			0.25	215	19.9074						0.25	1.354	27.08
		0.5	199	90.4545						205	0.5	85.4167			0.5	357	33.0556						0.5	4.412	88.24
		1	204	92.7273						216	1	90			1	633	58.6111						1	4.424	88.48
		3	206	93.6364						220	3	91.6667			3	924	85.5556						3	4.444	88.88
		8	206	93.6364						220	8	91.6667			8	1040	96.2963						8	4.4	88
			220	100						240		100				1080	100							5	100
										NPYM-25									NPYM-29									NPYM-20
		Cyclohexylamine NPYM-24									Tempo	Area %							Tempo	Area								Tempo	Area
			Tempo	Area %							0	0							0	0								0	2
			0	0							0.25	60							0.25	34								0.25	27
			0.25	15							0.5	98							0.5	88								0.5	41
			0.5	85							1	96							1	95								1	56
			1	100							3	95							3	94								3	82
			3	100							6	97							6	97								6	94
			6	100							8	98							8	96								8	95
			8	100
			NPYM-30								NPYM-26							NPYM-27								NPYM-28
			Tempo	Area							Tempo	Area						Tempo	Area							Tempo	Area
			0	0							0	0						0	0							0	0
			0.25	10							0.25	58						0.25	10							0.25	82
			0.5	54							0.5	69						0.5	33							0.5	93
			1	80							1	81						1	88							1	94
			3	95							3	88						3	90							3	94
			6	93							6	94						6	91							6	94
			8	97							8	94						8	91							8	94

## Sheet: Foglio2
FENOLO			SAHA			AMMINA			AMMIDE
Aree	PERCENTUALI	Tempi (h)	Tempi (h)	Aree	PERCENTUALI	Tempo (h)	Aree	PERCENTUALI	Tempo	Aree	PERCENTUALI
0	0	0	0	0	0	0	0	0	0	0	0
183	0.831818	0.25	139	0.25	0.579167	0.25	215	0.199074	0.25	1.354	0.2708
199	0.904545	0.5	205	0.5	0.854167	0.5	257	0.237963	0.5	4.412	0.8824
204	0.927273	1	216	1	0.9	1	333	0.308333	1	4.424	0.8848
206	0.936364	3	220	3	0.916667	3	724	0.67037	3	4.444	0.8888
206	0.936364	8	220	8	0.916667	8	1040	0.962963	8	4.4	0.88
220	1		240		1		1080	1		5	1
